# Supplementary material for: Association of Lower Plasma Fetuin-A Levels With Peripheral Arterial Disease in Type 2 Diabetes
Source: Oxford University Press journal article supplement (doi:10.2337/dc09-1541), 2009-11-12
Supplement: dc09-1541_online_appendix.pdf [file dc09-1541_online_appendix.pdf]

**Figure 1. Trend analysis of Fetuin-A Levels across Ankle-Brachial Index Categories in subjects with Type-2 Diabetes.**

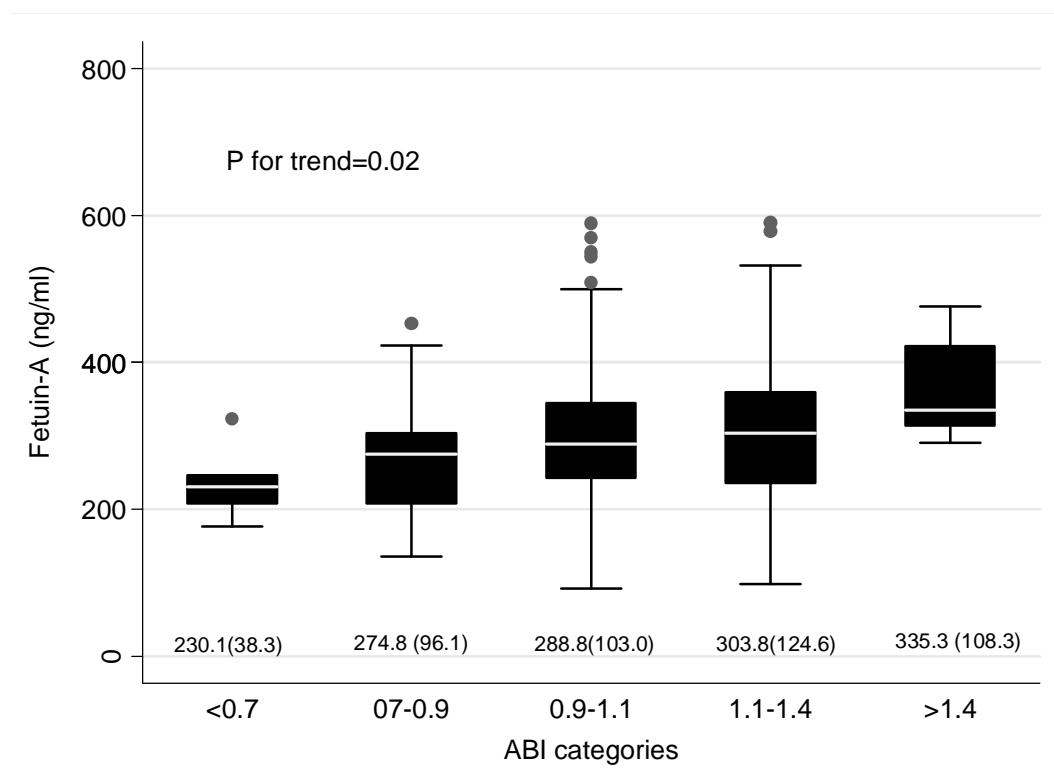

Fetuin-A levels are shown as median (IQR). The figure includes subjects with ABI > 1.4 to demonstrate the trend across ABI categories. Subjects with ABI > 1.4 (N=13), most likely reflecting non-compressible arteries, were excluded from the PAD association models.
